# Supplementary material for: In situ modulation of silica-supported MoO2/Mo2C heterojunction for enhanced hydrogen evolution reaction
Source: Royal Society of Chemistry journal article supplement (doi:10.1039/d0cy00890g), 2020-01-01
Supplement: d0cy00890g1.pdf [file d0cy00890g1.pdf]

# ***In-situ* modulation of silica-supported MoO<sub>2</sub>/Mo<sub>2</sub>C heterojunction for enhanced hydrogen evolution reaction**

Rajinder Kumar,<sup>a</sup> Zubair Ahmed,<sup>a</sup> Ravi Kumar,<sup>b</sup> <sup>a</sup> Shambhu Nath Jha,<sup>b</sup> Dibyendu  
Bhattacharyya,<sup>b</sup> Chandan Bera, \* and Vivek Bagchi <sup>a</sup> \*

<sup>a</sup> *Institute of Nano Science and Technology, Phase-10, Sector-64, Mohali, Punjab 160062, India*

<sup>b</sup> *Atomic and Molecular Physics Division Bhabha Atomic Research Centre, Mumbai- 400 085*

## **Supporting information**

## **List of Content**

### **S1. Detailed information of catalyst synthesis**

#### **S2.1. PXRD and DLS study of Si-MoO<sub>3</sub> nanoparticles**

#### **S2.2. PXRD pattern of melamine-GO precursor**

#### **S2.3. PXRD patterns of Si-Mo<sub>2</sub>C and Si-MoO<sub>2</sub>**

#### **S3.1. Rietveld refinement study of SiMoCat1 and SiMoCat2**

#### **S3.2. Rietveld refinement parameters of the catalysts**

#### **S4.1. XANES and EXAFS studies**

#### **S4.2. EXAFS measurements of standard MoO<sub>2</sub>, Mo<sub>2</sub>C, and SiMoCat**

#### **S4.3. Table for Bond length, coordination number, and disorder factor obtain by EXAFS fitting for the samples SiMoCat at Mo K-edge**

### **S5. STEM analysis of SiMoCat**

### **S6. BET analysis of Si-MoO<sub>3</sub> and SiMoCat**

#### **S7.1. Polarisation curves of other synthesized electrocatalysts**

#### **S7.2. A comparison of kinetic parameters of all the catalysts**

#### **S7.3. EIS measurements of SiMoCat and SiMoCat-m**

### **S8. Theoretical Study**

## S1. Detailed information of catalyst synthesis

The synthesis of all the catalysts were carried out in two major steps. First, the preparation of metal precursor and second, the calcination of the molybdenum precursor by temperatures controlled annealing in an argon atmosphere at different time periods.

- a. Synthesis of MoO<sub>3</sub> nanoparticles:** For the hydrothermal synthesis of MoO<sub>3</sub> nanoparticles, two separate solutions containing ammonium molybdate (0.001 moles, 1.2358 gm) and citric acid (0.03 moles, 5.8 gm) were prepared by dissolving each in 20 mL of distilled water. A few drops of 12 M HCl were added to the obtained transparent solution by stirring to maintain a pH of 1-2 resulting in a blue coloured solution. This bluish-coloured solution heated at 180 °C for the next 24 h in a hydrothermal bomb. The obtained hydrothermal product was dried at 100 °C. Finally, the powder was heated at 500 °C for 2 h to yield MoO<sub>3</sub> nanoparticles.
- b. MoO<sub>2</sub>:** MoO<sub>2</sub> catalyst was synthesized by annealing 15 mg of MoO<sub>3</sub> with 100 mg of GO-based carbon source (preparation described in the experimental section of the manuscript) at 800 °C for 1 h in an argon atmosphere at a flow rate of 30 mL/min.
- c. Mo<sub>2</sub>C:** For Mo<sub>2</sub>C catalyst has been synthesized with 15 mg MoO<sub>3</sub> nanoparticles and 250 mg GO-based carbon source, mixed in a mortar pestle. The mixture was heated at 800 °C for 3 h in argon atmosphere with a flow rate of 30 mL/min.
- d. Silica-based MoO<sub>2</sub> (Si-MoO<sub>2</sub>):** Si-MoO<sub>2</sub> was synthesized by annealing 25 mg of Si-MoO<sub>3</sub> (as mentioned in manuscript) with 100 mg of GO-based carbon source annealed at 800 °C for 1 h in an argon atmosphere at a flow rate of 30 mL/min.
- e. Silica-based Mo<sub>2</sub>C (Si-Mo<sub>2</sub>C):** Si-Mo<sub>2</sub>C catalyst was synthesized annealing 25 mg Si-MoO<sub>3</sub> nanoparticles (preparation described in the experimental section of the manuscript) and 250 mg GO-based carbon source was mixed in a mortar pestle. The mixture was heated at 800 °C for 3 h in an argon atmosphere with a flow rate of 30 mL/min.
- f. SiMoCat1:** SiMoCat1 was synthesized by annealing a mixture of 25 mg Si-MoO<sub>3</sub> precursor (as mentioned in the manuscript) and 225 mg of GO-based carbon source for 3.5 h at 800 °C in argon atmosphere.
- g. SiMoCat2:** SiMoCat2 was synthesized by annealing a mixture of 25 mg Si-MoO<sub>3</sub> precursor (as mentioned in the manuscript) and 100 mg of GO-based carbon source for 2.5 h at 800 °C in argon atmosphere.

**Note:** The heating rate in all the synthesis process was 400 °C/min, and the post-reaction cooling was done in an argon environment with a gas flow of 30 mL/min.

### S2.1. PXRD and DLS study of Si-MoO<sub>3</sub> nanoparticles

The XRD pattern was obtained in the 2θ angular region of 5° to 80° with an increment of 0.00190/Step. DLS measurements were performed on Malvern zetasizer nano ZSP instrument.

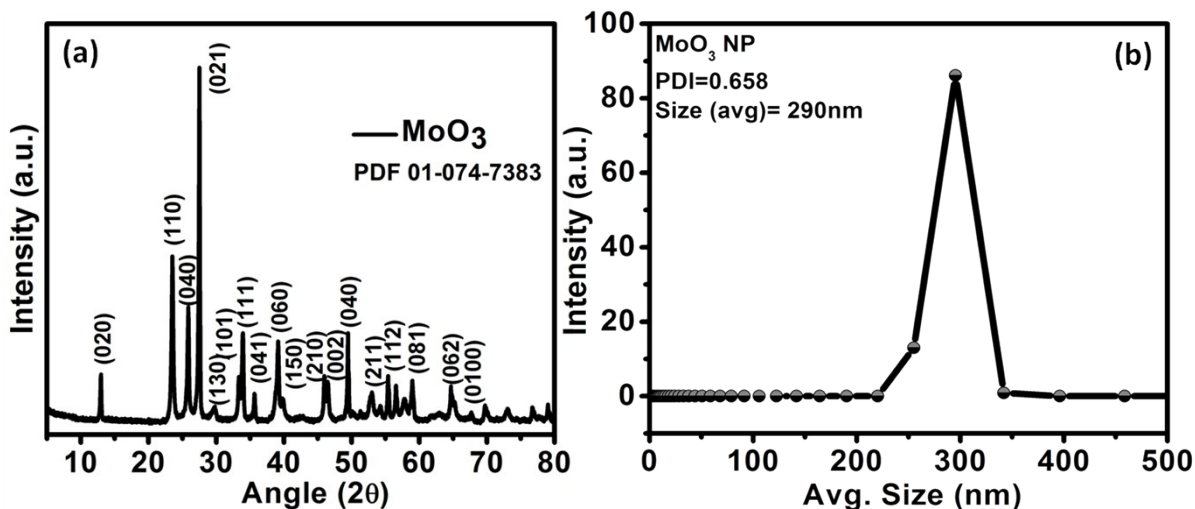

Figure S1. PXRD (a) and DLS (b) pattern of Si-MoO<sub>3</sub> nanoparticles

### S2.2. PXRD pattern of GO based precursor (Melamine-GO)

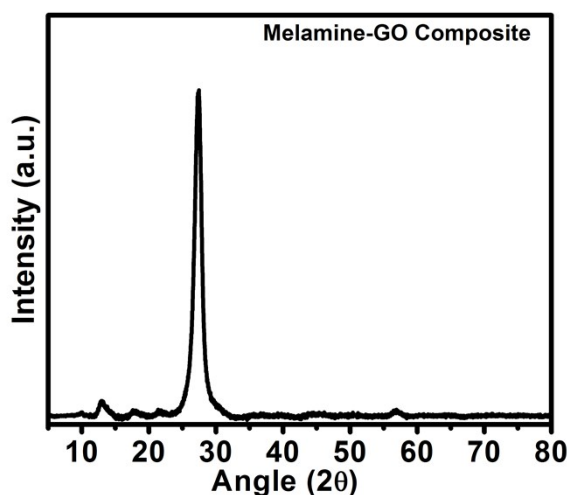

Figure S2. PXRD pattern of Melamine-GO Composite

### S2.3. PXRD pattern of Si-Mo<sub>2</sub>C and Si-MoO<sub>2</sub>

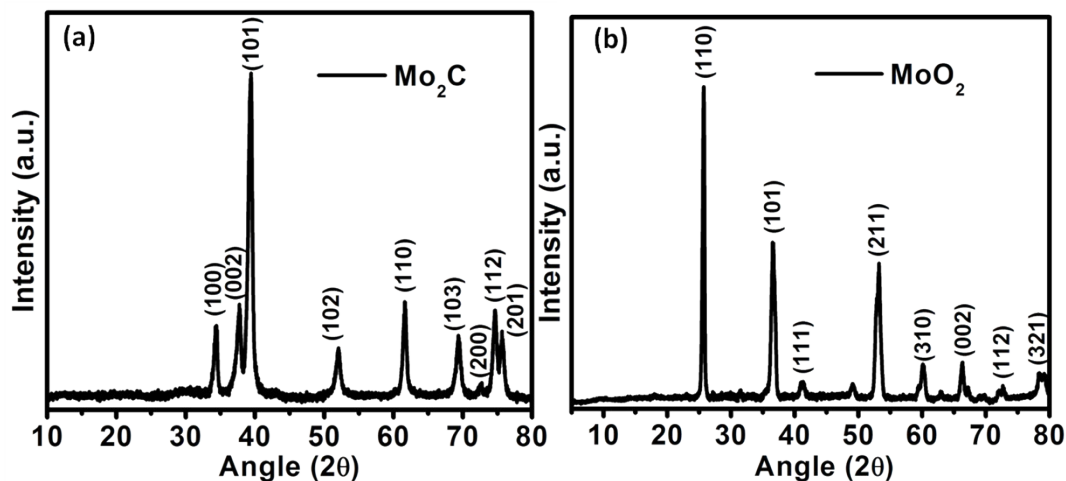

Figure S3. PXRD of (a) Si-Mo<sub>2</sub>C and (b) Si-MoO<sub>2</sub>

### S3.1. Rietveld refinement study of SiMoCat1 and SiMoCat2

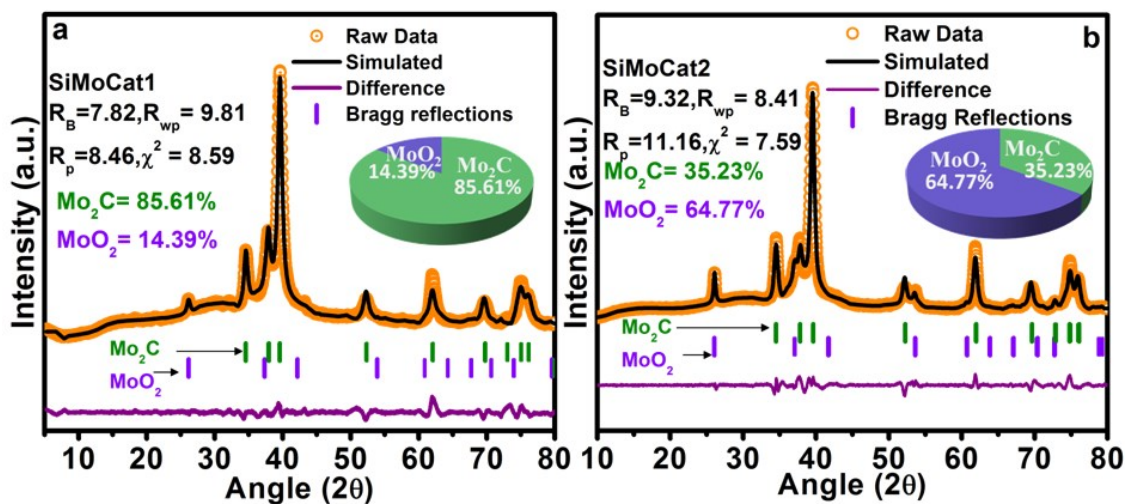

Figure S4. Rietveld refinement of (a) SiMoCat1 and (b) SiMoCat2: The figure typically shows formation of both Mo<sub>2</sub>C and MoO<sub>2</sub> phases and Rietveld analysis of catalyst shows a composition 85.61 % and 14.39 % of Mo<sub>2</sub>C and MoO<sub>2</sub> respectively in SiMoCat1 and a composition of 35.23 % and 64.77 % of Mo<sub>2</sub>C and MoO<sub>2</sub> respectively in SiMoCat2.

### S3.2. Rietveld refinement parameters of the catalysts

Tables (below) showing the unit cell parameters of SiMoCat, SiMoCat1, and SiMoCat2 and their corresponding refinement values

| <i>SiMoCat</i> |                   |                   |           |                  |           |
|----------------|-------------------|-------------------|-----------|------------------|-----------|
| Sr. No.        | Parameters        | Mo <sub>2</sub> C |           | MoO <sub>2</sub> |           |
| 1              | Symmetry          | Hexagonal         |           | Tetragonal       |           |
| 2              | Space group       | 194               |           | 136              |           |
|                |                   | Input             | Output    | Input            | Output    |
| 3              | a                 | 2.99091 Å         | 2.98920 Å | 4.82993 Å        | 4.83969 Å |
| 4              | b                 | 2.99091 Å         | 2.98920 Å | 4.82993 Å        | 4.83969 Å |
| 5              | c                 | 4.71022 Å         | 4.75052 Å | 2.81968 Å        | 2.78542 Å |
| 6              | $\alpha$          | 90°               | 90°       | 90°              | 90°       |
| 7              | $\beta$           | 90°               | 90°       | 90°              | 90°       |
| 8              | $\gamma$          | 120°              | 120°      | 90°              | 90°       |
| 9              | R <sub>p</sub> %  | 10.36             |           |                  |           |
| 10             | R <sub>wp</sub> % | 9.31              |           |                  |           |
| 11             | $\chi^2$          | 4.59              |           |                  |           |

**Table S1. Refinement parameters of SiMoCat**

| <i>SiMoCat1</i> |                   |                   |           |                  |           |
|-----------------|-------------------|-------------------|-----------|------------------|-----------|
| Sr. No.         | Parameters        | Mo <sub>2</sub> C |           | MoO <sub>2</sub> |           |
| 1               | Symmetry          | Hexagonal         |           | Tetragonal       |           |
| 2               | Space group       | 194               |           | 136              |           |
|                 |                   | Input             | Output    | Input            | Output    |
| 3               | a                 | 2.99091 Å         | 2.99376 Å | 4.82993 Å        | 4.81431 Å |
| 4               | b                 | 2.99091 Å         | 2.99376 Å | 4.82993 Å        | 4.81431 Å |
| 5               | c                 | 4.71022 Å         | 4.74662 Å | 2.81968 Å        | 2.76749 Å |
| 6               | $\alpha$          | 90°               | 90°       | 90°              | 90°       |
| 7               | $\beta$           | 90°               | 90°       | 90°              | 90°       |
| 8               | $\gamma$          | 120°              | 120°      | 90°              | 90°       |
| 9               | R <sub>p</sub> %  | 8.46              |           |                  |           |
| 10              | R <sub>wp</sub> % | 9.81              |           |                  |           |
| 11              | $\chi^2$          | 8.59              |           |                  |           |

**Table S2. Refinement parameters of SiMoCat1**

| <i>SiMoCat2</i> |                   |                   |           |                  |           |
|-----------------|-------------------|-------------------|-----------|------------------|-----------|
| Sr. No.         | Parameters        | Mo <sub>2</sub> C |           | MoO <sub>2</sub> |           |
| 1               | Symmetry          | Hexagonal         |           | Tetragonal       |           |
| 2               | Space group       | 194               |           | 136              |           |
|                 |                   | Input             | Output    | Input            | Output    |
| 3               | a                 | 2.99091 Å         | 2.99696 Å | 4.82993 Å        | 4.83366 Å |
| 4               | b                 | 2.99091 Å         | 2.99696 Å | 4.82993 Å        | 4.83666 Å |
| 5               | c                 | 4.71022 Å         | 4.75537 Å | 2.81968 Å        | 2.80616 Å |
| 6               | α                 | 90°               | 90°       | 90°              | 90°       |
| 7               | β                 | 90°               | 90°       | 90°              | 90°       |
| 8               | γ                 | 120°              | 120°      | 90°              | 90°       |
| 9               | R <sub>p</sub> %  | 11.16             |           |                  |           |
| 10              | R <sub>wp</sub> % | 8.41              |           |                  |           |
| 11              | χ <sup>2</sup>    | 7.59              |           |                  |           |

**Table S3. Refinement parameters of SiMoCat2**

#### S4.1. XANES and EXAFS studies:

The XAFS measurements of the Mo based catalysts along with the Mo standards have been carried out at the Energy Scanning EXAFS beamline (BL-9) at the Indus-2 Synchrotron Source (2.5 GeV, 100 mA), Raja Ramanna Centre for Advanced Technology (RRCAT), Indore, India<sup>1-2</sup> on Mo K-edges. This beamline operates in the energy range of 4 KeV to 25 KeV. The beamline optics consists of a Rh/Pt coated collimating meridional cylindrical mirror and the collimated beam reflected by the mirror is monochromatized by a Si (111) (2d=6.2709 Å) based double crystal monochromator (DCM). The second crystal of DCM is a sagittal cylinder used for horizontal focusing while Rh/Pt coated bendable post mirror facing down is used for vertical focusing of the beam at the sample position. Rejection of the higher harmonics content in the X-ray beam is performed by detuning the second crystal of DCM. In the present case, XAS measurements have been performed in both transmission and fluorescent modes. For the transmission mode measurement, three ionization chambers (300 mm length each) have been used for data collection, one ionization chamber for measuring incident flux ( $I_0$ ), the second one for measuring transmitted flux ( $I_t$ ) and the third ionization chamber for measuring XAS spectrum of a reference metal foil for energy calibration. Appropriate gas pressure and gas mixtures have been chosen to achieve 10-20% absorption in the first ionization chamber and 70-90% absorption in the second ionization

chamber to improve the signal to noise ratio. The absorption coefficient  $\mu$  is obtained using the relation:

$$I_T = I_0 e^{-\mu x} \quad (1)$$

where  $x$  is the thickness of the absorber.

For measurements in the fluorescence mode, the sample is placed at  $45^\circ$  to the incident X-ray beam and a fluorescence detector is placed at a right angle to the incident X-ray beam to collect the signal. One ionization chamber detector is placed prior to the sample to measure the incident flux ( $I_0$ ) and fluorescence detector measures the fluorescence intensity ( $I_f$ ). From these intensities, the absorbance of the sample ( $\mu = I_f/I_0$ ) is found as a function of energy.

### **Mo edge:**

The Mo K-edge absorption edges of the samples have been obtained from the 1<sup>st</sup> inflexion point of the  $\mu$  vs. E curves. The K-edge energy in XANES and Fourier transformed EXAFS (FT-EXAFS) of Mo precursor, Mo foil along with the references MoO<sub>2</sub> and Mo<sub>2</sub>C as reference sample are studied to compare with the SiMoCat catalyst. From the XANES spectrum, it can be seen that the oxidation state of the sample is less than +6. The absorption edges of Mo in the samples SiMoCat lies very close to the Mo<sub>2</sub>C towards to low energy side of MoO<sub>2</sub>, which shows that Mo in SiMoCat having an oxidation in between 2 and 3 with little energy difference form the Mo<sub>2</sub>C energy edge value. The XANES spectrum of AMH ((NH<sub>4</sub>)<sub>6</sub>Mo<sub>7</sub>O<sub>24</sub>) shows pre-edge at 20007 eV which is due to 1s-4d dipole forbidden transition. AMH has tetrahedral symmetry, which has mixed Mo-d and O-p bond characters.

To obtain the qualitative information about the local structure, oscillations in the absorption spectra  $\mu(E)$  have been converted to absorption function  $\chi(E)$  defined as follows:

$$\chi(E) = \frac{\mu(E) - \mu_0(E)}{\Delta\mu_0(E_0)} \quad (2)$$

where  $E_0$  is the absorption edge energy,  $\mu_0(E_0)$  is the bare atom background and  $\Delta\mu_0(E_0)$  is the step in  $\mu(E)$  value at the absorption edge. The energy-dependent absorption coefficient  $\chi(E)$  has been converted to the wave-number dependent absorption coefficient  $\chi(k)$  using the relation,



$$K = \sqrt{\frac{2m(E - E_0)}{\hbar^2}} \quad (3)$$

where  $m$  is the electron mass.  $\chi(k)$  is weighted by  $k^2$  to amplify the oscillation at high  $k$  and the  $\chi(k)k^2$  functions are Fourier transformed in  $R$  space to generate the  $\chi(R)$  versus  $R$  spectra in terms of the real distances from the centre of the absorbing atom. The set of EXAFS data analysis programme available within Demeter<sup>3</sup> software package has been used for EXAFS data analysis. This includes background reduction and Fourier transforms to derive the  $\chi(R)$  versus  $R$  spectra from the absorption spectra (using ATHENA<sup>3</sup> software), generation of the theoretical EXAFS spectra starting from an assumed crystallographic structure and finally fitting of experimental data with the theoretical spectra using ARTEMIS<sup>3</sup> software. To obtain the qualitative information about the local structure, oscillations in the absorption spectra  $\mu(E)$  have been converted to absorption function  $\chi(E)$  defined as follows:

$$\chi(E) = \frac{\mu(E) - \mu_0(E)}{\Delta\mu_0(E_0)} \quad (4)$$

where  $E_0$  is absorption edge energy,  $\mu_0(E_0)$  is the bare atom background and  $\Delta\mu_0(E_0)$  is the step in  $\mu(E)$  value at the absorption edge. The energy-dependent absorption coefficient  $\chi(E)$  has been converted to the wavenumber dependent absorption coefficient  $\chi(k)$  using the relation,

$$K = \sqrt{\frac{2m(E - E_0)}{\hbar^2}} \quad (5)$$

where  $m$  is the electron mass.  $\chi(k)$  is weighted by  $k^2$  to amplify the oscillation at high  $k$  and the  $\chi(k)k^2$  functions are Fourier transformed in  $R$  space to generate the  $\chi(R)$  versus  $R$  spectra in terms of the real distances from the centre of the absorbing atom. The set of EXAFS data analysis programme available within Demeter<sup>3</sup> software package has been used for EXAFS data analysis. This includes background reduction and Fourier transforms to derive the  $\chi(R)$  versus  $R$  spectra from the absorption spectra (using ATHENA<sup>3</sup> software), generation of the theoretical EXAFS spectra starting from an assumed crystallographic structure and finally fitting of experimental data with the theoretical spectra using ARTEMIS<sup>3</sup> software. The  $\chi(R)$  versus  $R$  plots at Mo K-edges

are shown in figure S7 for the catalyst SiMoCat. The data of these samples have been fitted by taking  $\text{Mo}_2\text{C}$  and  $\text{MoO}_2$  crystal structure. In the fitting process the co-ordination number (C.N), atom to atom bond distance ( $R$ ) between the respective atomic pairs and the disorder factor (Debye-Waller factor) ( $\sigma^2$ ), which gives the mean square fluctuation in the atomic bond lengths and the thermal disorder in the system, have been used as fitting parameters and the best-fit parameters have been shown in table S4. The goodness of fit has been determined by the value of the  $R_{factor}$  defined by:

$$R_{factor} = \sum \frac{[\text{Im}(\chi_{dat}(r_i) - \chi_{th}(r_i))]^2 + [\text{Re}(\chi_{dat}(r_i) - \chi_{th}(r_i))]^2}{[\text{Im}(\chi_{dat}(r_i))]^2 + [\text{Re}(\chi_{dat}(r_i))]^2} \quad (6)$$

where,  $\chi_{dat}$  and  $\chi_{th}$  refer to the experimental and theoretical  $\chi(r)$  values respectively and Im and Re refer to the imaginary and real parts of the respective quantities. From figure S7 it can be seen that SiMoCat have a radial distribution which basically is a linear combination of  $\text{MoO}_2$  and  $\text{Mo}_2\text{C}$  radial distribution. The first and second peak has the contribution of Mo-O and Mo-C coordination shell, while the third peak has the contribution of Mo-Mo coordination shell. The best-fit parameters have been shown in Section S4.3, Table S4.

#### S4.2. EXAFS measurements of standard $\text{MoO}_2$ , $\text{Mo}_2\text{C}$ , and SiMoCat

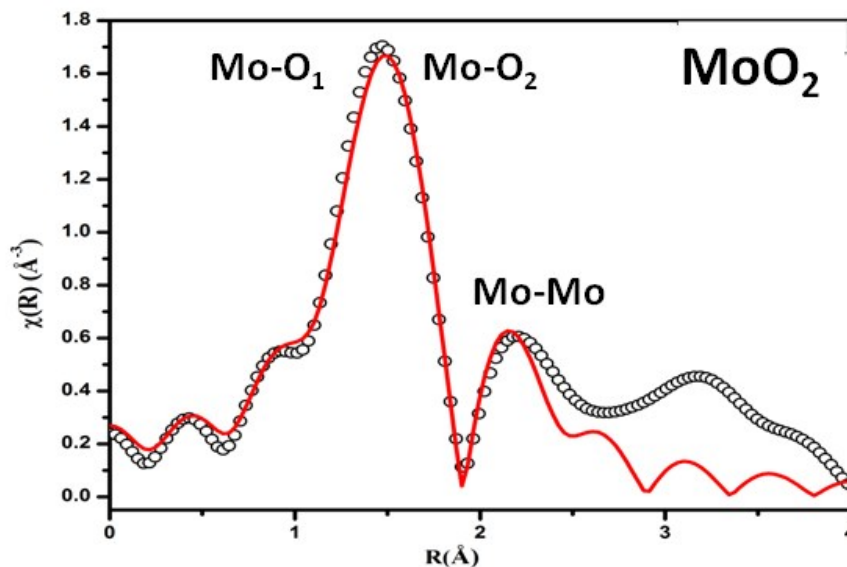

Figure S5. Fourier transformed EXAFS spectrum of  $\text{MoO}_2$  sample measured at Mo K-edge along with best-fit theoretical spectrum. The experimental spectrum is represented by scatter points and the theoretical fit is represented by solid line.

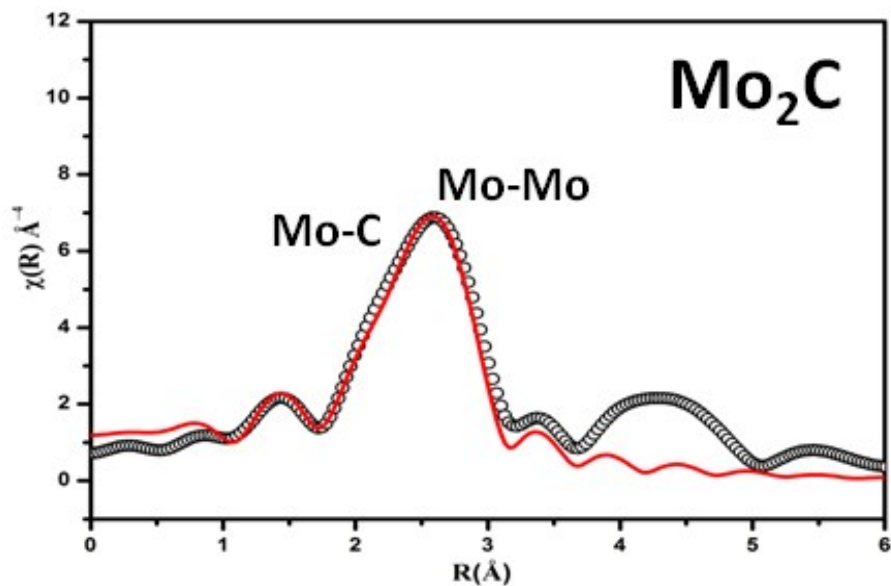

Figure S6. Fourier transformed EXAFS spectrum of  $\text{Mo}_2\text{C}$  sample measured at Mo K-edge along with best-fit theoretical spectrum. The experimental spectrum is represented by scatter points and the theoretical fit is represented by a solid line.

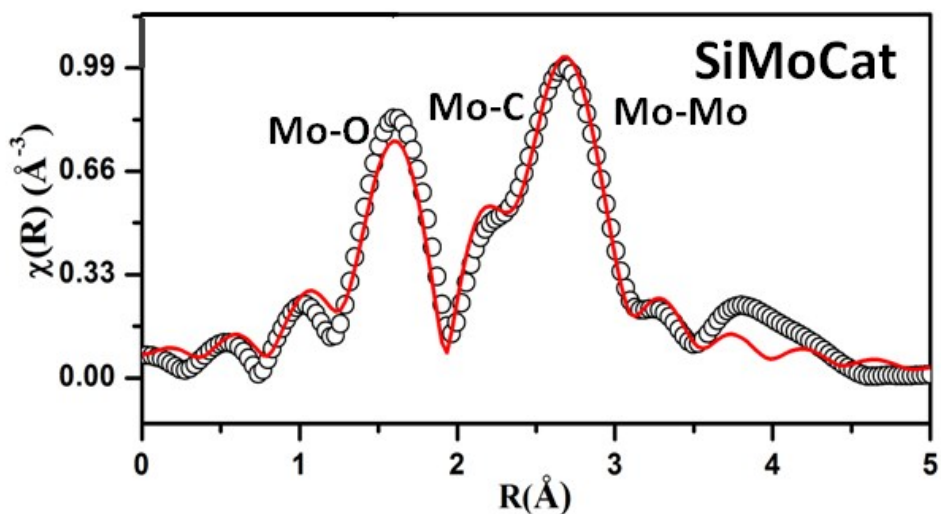

Figure S7. Fourier transformed EXAFS spectrum of SiMoCat sample measured at Mo K-edge along with best-fit theoretical spectrum. The experimental spectrum is represented by scatter points and the theoretical fit is represented by a solid line.

**S4.3. Table for Bond length, coordination number and disorder factor obtained from EXAFS fitting for the samples SiMoCat at Mo K-edge**

| Path                                          | Parameter      | SiMoCat        | Path                | Parameter      | MoO <sub>2</sub> | Path                | Parameters     | Mo <sub>2</sub> C |
|-----------------------------------------------|----------------|----------------|---------------------|----------------|------------------|---------------------|----------------|-------------------|
| Mo edge                                       |                |                | Mo edge             |                |                  | Mo edge             |                |                   |
| Mo-C<br>(From Mo <sub>2</sub> C)              | R (Å) (2.09)   | 2.14 ± 0.01    | Mo-O <sub>1</sub>   | R (Å) (1.98)   | 1.98 ± 0.002     | Mo-C                | R (Å) (2.09)   | 2.14 ± 0.04       |
|                                               | N(6)           | 6.0 ± 0.12     |                     | N(4)           | 4.0 ± 0.05       |                     | N(6)           | 5.53 ± 1.26       |
|                                               | σ <sup>2</sup> | 0.001          |                     | σ <sup>2</sup> | 0.0015 ± 0.0004  |                     | σ <sup>2</sup> | 0.024 ± 0.009     |
| Mo-Mo<br>(From Mo <sub>2</sub> C)             | R (Å) (2.99)   | 2.96 ± 0.003   | Mo-O <sub>2</sub>   | R (Å) (2.07)   | 2.07 ± 0.003     | Mo-Mo               | R (Å) (2.99)   | 2.93 ± 0.01       |
|                                               | N(6)           | 6.0 ± 0.12     |                     | N(2)           | 2.0 ± 0.03       |                     | N(12)          | 11.46 ± 1.68      |
|                                               | σ <sup>2</sup> | 0.002 ± 0.0006 |                     | σ <sup>2</sup> | 0.0015 ± 0.0004  |                     | σ <sup>2</sup> | 0.011 ± 0.001     |
| Mo-O <sub>1</sub><br>(From MoO <sub>2</sub> ) | R (Å) (1.98)   | 1.83 ± 0.002   | Mo-Mo               | R (Å) (2.51)   | 2.59 ± 0.006     |                     |                |                   |
|                                               | N(4)           | 4.0 ± 0.07     |                     | N(1)           | 1.0 ± 0.01       |                     |                |                   |
|                                               | σ <sup>2</sup> | 0.045 ± 0.007  |                     | σ <sup>2</sup> | 0.0013 ± 0.0003  |                     |                |                   |
| Mo-O <sub>2</sub><br>(From MoO <sub>2</sub> ) | R (Å) (2.07)   | 1.91 ± 0.003   |                     |                |                  |                     |                |                   |
|                                               | N(2)           | 2.0 ± 0.05     |                     |                |                  |                     |                |                   |
|                                               | σ <sup>2</sup> | 0.045 ± 0.007  |                     |                |                  |                     |                |                   |
| R <sub>factor</sub>                           |                | 0.01           | R <sub>factor</sub> |                | 0.02             | R <sub>factor</sub> |                | 0.001             |

**Table S4. Bond length, coordination number and disorder factor obtain by EXAFS fitting for the samples SiMoCat at Mo K-edge**

## S5. STEM analysis of SiMoCat

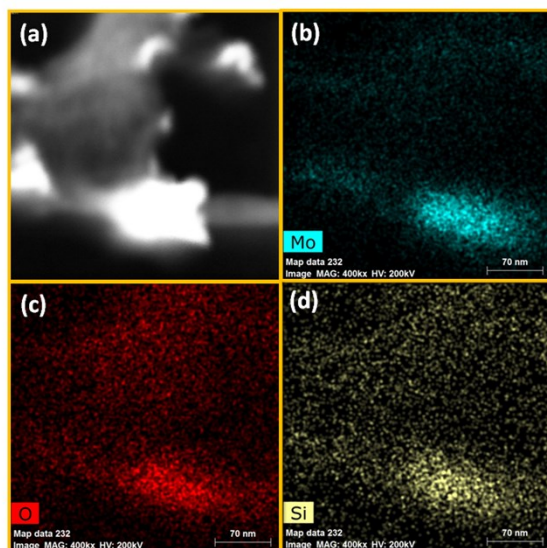

Figure S8. STEM images of SiMoCat Catalyst: The images showing the presence of Mo, O and Si in the SiMoCat

## S6. BET analysis of Si-MoO<sub>3</sub> and SiMoCat

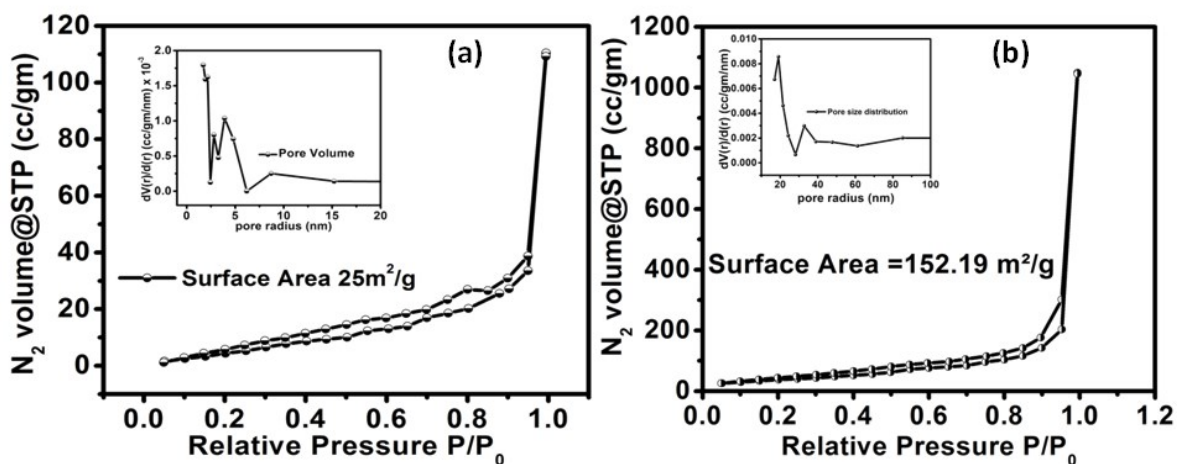

Figure S9. Nitrogen adsorption BET isotherms and inset showing BJH pore distribution of the catalyst (a) Si-MoO<sub>3</sub> (b) SiMoCat: The catalyst was degassed at temperature 200 °C for 6 h before BET analysis

### S7.1. Polarisation curves of other synthesized electrocatalysts

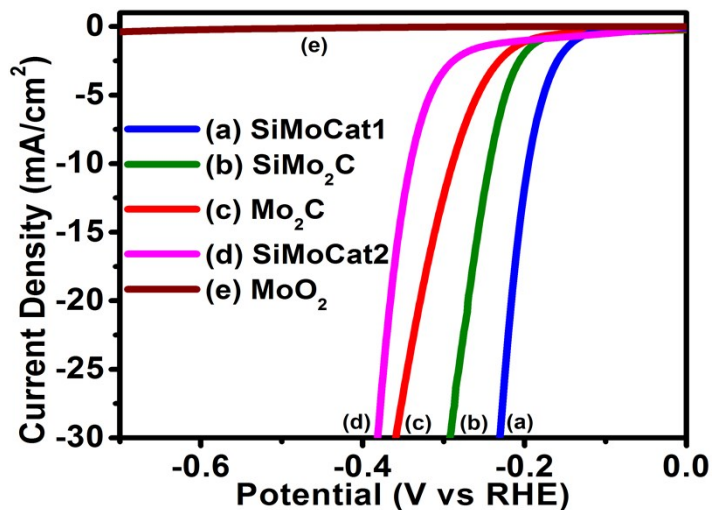

Figure S10. Polarisation curve of catalyst (a) SiMoCat1 (b) Si-Mo<sub>2</sub>C (c) Mo<sub>2</sub>C (d) SiMoCat2 (e) MoO<sub>2</sub> in 0.5 M acidic media

### S7.2. A comparison of kinetic parameters of all the catalysts

| Catalyst            | Onset (vs RHE) | $\eta_{10}$ (vs RHE) | $\eta_{20}$ (vs RHE) | $\eta_{30}$ (vs RHE) | Tafel Slope (mV/dec) | Exchange Current Density (mA/cm <sup>2</sup> ) |
|---------------------|----------------|----------------------|----------------------|----------------------|----------------------|------------------------------------------------|
| SiMoCat             | 31 mV          | 71 mV                | 86 mV                | 90 mV                | 35                   | $2.33 \times 10^{-2}$                          |
| Mo <sub>2</sub> C   | 204 mV         | 290 mV               | 328 mV               | 359 mV               | 97                   | $5.71 \times 10^{-3}$                          |
| SiMo <sub>2</sub> C | 187 mV         | 244 mV               | 271 mV               | 293 mV               | 85                   | $6.32 \times 10^{-3}$                          |
| SiMoCat1            | 137 mV         | 195 mV               | 216 mV               | 229 mV               | 62                   | $8.16 \times 10^{-3}$                          |
| SiMoCat2            | 218 mV         | 342 mV               | 349 mV               | 380 mV               | 112                  | $1.39 \times 10^{-4}$                          |
| SiMoCat-m           | 209 mV         | 285 mV               | 311 mV               | 329 mV               | 82                   | $4.17 \times 10^{-3}$                          |

Table S5. Calculated kinetic parametrs of different catalyst in 0.5 M H<sub>2</sub>SO<sub>4</sub> solution

### S7.3. EIS measurements of SiMoCat and SiMoCat-m.

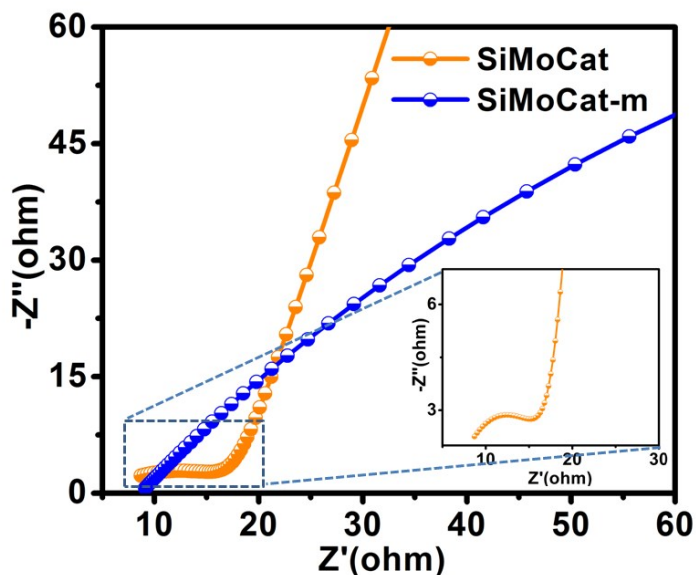

Figure S11. Nyquist plot of SiMoCat and SiMoCat-m; Inset: magnified image of SiMoCat catalyst at 50 mV applied potential.

### S8. Theoretical Study

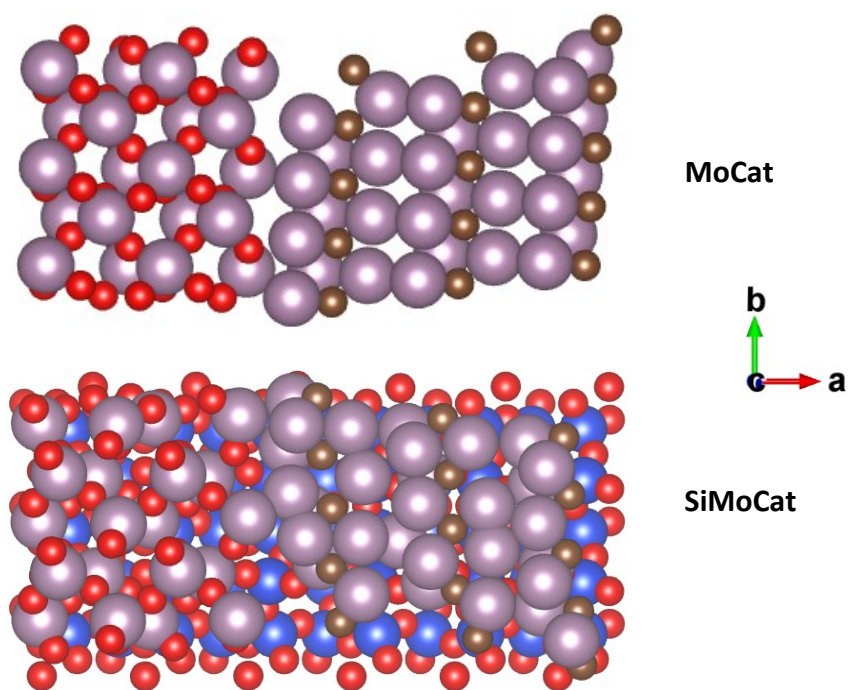

Figure S12. (Top) Heterostructure of Mo<sub>2</sub>C and MoO<sub>2</sub>. (Bottom) Mo<sub>2</sub>C and MoO<sub>2</sub> heterostructure on SiO<sub>2</sub> substrate. <101> surface exposed for Hydrogen absorption.

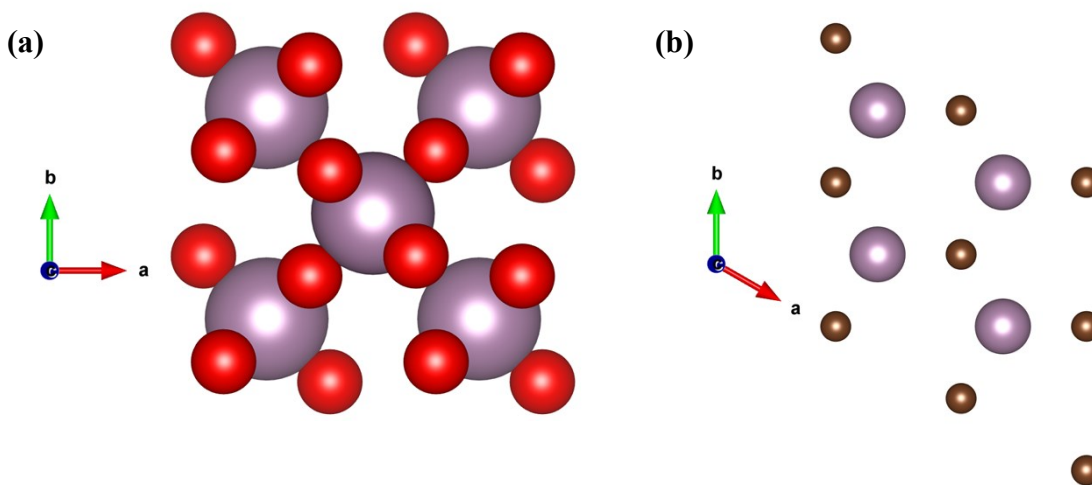

Figure S13. (a) Tetragonal MoO<sub>2</sub> with lattice constant a= 4.8 Å, b= 4.8 Å and c= 3.2Å, (b) Hexagonal Mo<sub>2</sub>C with lattice constant a= 2.88 Å, b= 2.88 Å and c= 5.48Å.

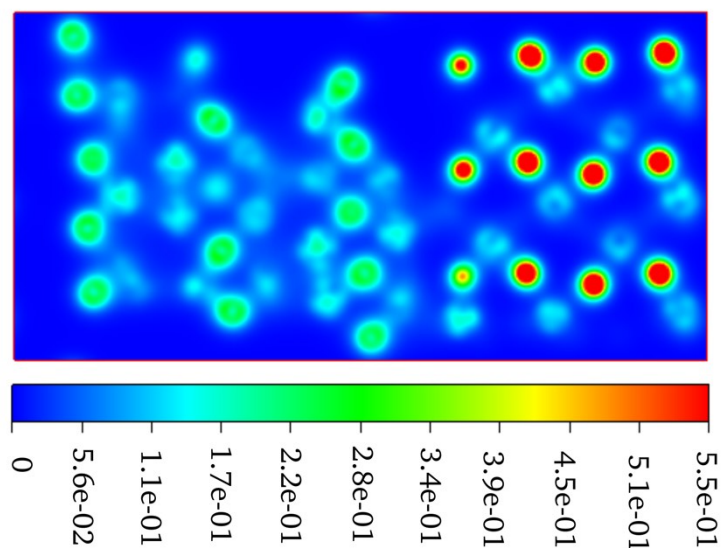

Figure S14. Surface charge distribution on SiMoCat <101> plane. It is found that charge density is very high around Mo atoms which make strong M-H bond and attract lot of hydrogen to surface. Comparatively O atoms have less and C atoms have very less charge density.



## References

1. Poswal, A. K.; Agrawal, A.; Yadav, A. K.; Nayak, C.; Basu, S.; Kane, S. R.; Garg, C. K.; Bhattacharyya, D.; Jha, S. N.; Sahoo, N. K., Commissioning and first results of scanning type EXAFS beamline (BL-09) at INDUS-2 synchrotron source. *AIP Conference Proceedings* 2014, 1591 (1), 649-651.
2. Basu, S.; Nayak, C.; Yadav, A. K.; Agrawal, A.; Poswal, A. K.; Bhattacharyya, D.; Jha, S. N.; Sahoo, N. K., A comprehensive facility for EXAFS measurements at the INDUS-2 synchrotron source at RRCAT, Indore, India. *Journal of Physics: Conference Series* 2014, 493 (1), 012032.
3. Newville, M.; Ravel, B.; Haskel, D.; Rehr, J. J.; Stern, E. A.; Yacoby, Y., Analysis of multiple-scattering XAFS data using theoretical standards. *Physica B: Condensed Matter* 1995, 208-209, 154-156.
